# Supplementary material
Source: PubMed Central journal article supplement (PMC5234716)
Supplement: 10.1194_M071142_jlr.M071142-1.pdf [file 10.1194_M071142_jlr.M071142-1.pdf]

**SUPPLEMENTAL INFORMATION:**

**Oxidized high-density lipoprotein induces macrophage apoptosis via toll-like receptor  
4-dependent CHOP pathway**

Shutong Yao<sup>1, 2, §</sup>, Hua Tian<sup>1, §</sup>, Li Zhao<sup>3, §</sup>, Jinguo Li<sup>2</sup>, Libo Yang<sup>4</sup>, Feng Yue<sup>4</sup>, Yanyan Li<sup>1</sup>,

Peng Jiao<sup>1</sup>, Nana Yang<sup>1</sup>, Yiwei Wang<sup>3</sup>, Xiangjian Zhang<sup>5</sup>, Shucun Qin<sup>1, \*</sup>

<sup>1</sup> Key Laboratory of Atherosclerosis in Universities of Shandong and Institute of Atherosclerosis, Taishan Medical University, Taian 271000, China

<sup>2</sup> College of Basic Medical Sciences, Taishan Medical University, Taian 271000, China

<sup>3</sup> Affiliated hospital of Chengde Medical University, Chengde Medical University, Chengde 067000, China

<sup>4</sup> Department of Endocrinology, Central Hospital of Taian, Taian 271000, China

<sup>5</sup> Hebei Collaborative Innovation Center for Cardio-cerebrovascular Disease, Hebei Key Laboratory of Vascular Homeostasis, Shijiazhuang 050000, China

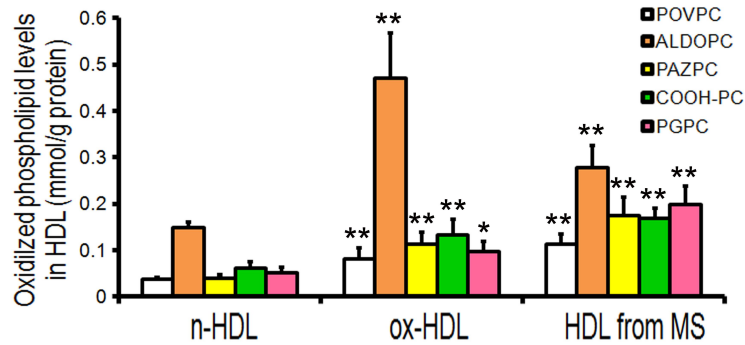

**Supplemental Figure S1: Liquid chromatography tandem mass spectrometry (LC–MS/MS) analysis of oxidized phosphatidylcholines in n-HDL, ox-HDL and HDL from metabolic syndrome (MS) patients.** Data are expressed as the mean  $\pm$  SD of six independent experiments. \* $P$ <0.05, \*\* $P$ <0.01 versus n-HDL. POVPC, 1-palmitoyl-2-(5'-oxo-valeroyl)-*sn*-glycero-3-phosphocholine; ALDOPC, 1-palmitoyl-2-(9'-oxo-nonanoyl)-*sn*-glycero-3-phosphocholine; PAZPC, 1-palmitoyl-2-azelaoyl-*sn*-glycero-3-phosphocholine; COOH-PC, 1-hexadecyl-2-azelaoyl-*sn*-glycero-3-phosphocholine; PGPC, 1-palmitoyl-2-glutaryl-*sn*-glycero-3-phosphocholine.

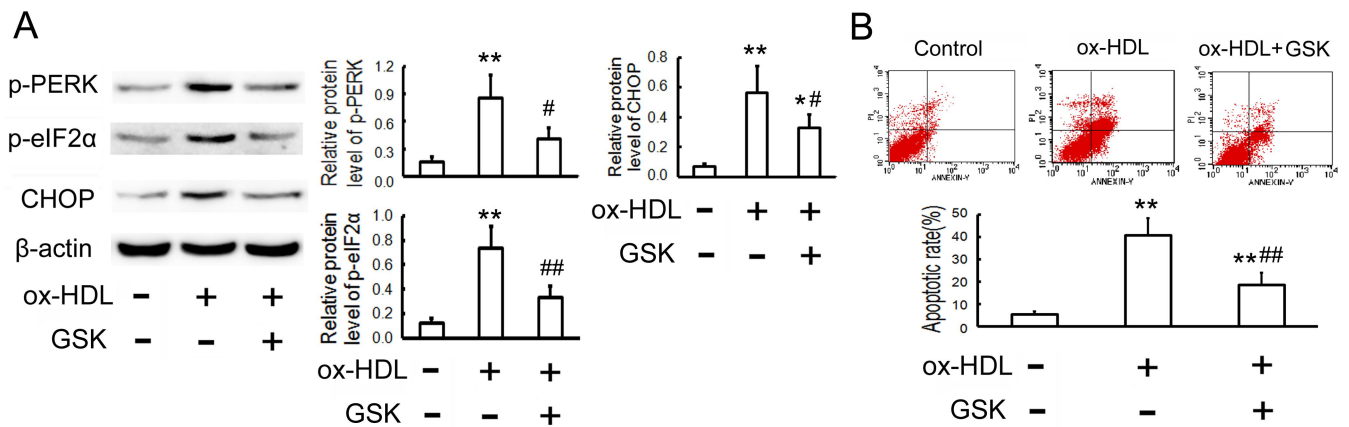

**Supplemental Figure S2: GSK2606414 inhibits CHOP-mediated macrophage apoptosis induced by ox-HDL.** RAW264.7 cells were pretreated with or without 40 nmol/L GSK2606414 (PERK inhibitor) for 1 h, and then stimulated with ox-HDL (100 mg/L) for 24 h. The protein levels of ER stress markers and apoptosis were determined by Western blot (A) and flow cytometry (B), respectively. Data are expressed as the mean  $\pm$  SD of at least three independent experiments. \* $P$ <0.05, \*\* $P$ <0.01 versus control group; # $P$ <0.05, ## $P$ <0.01 versus ox-HDL group.

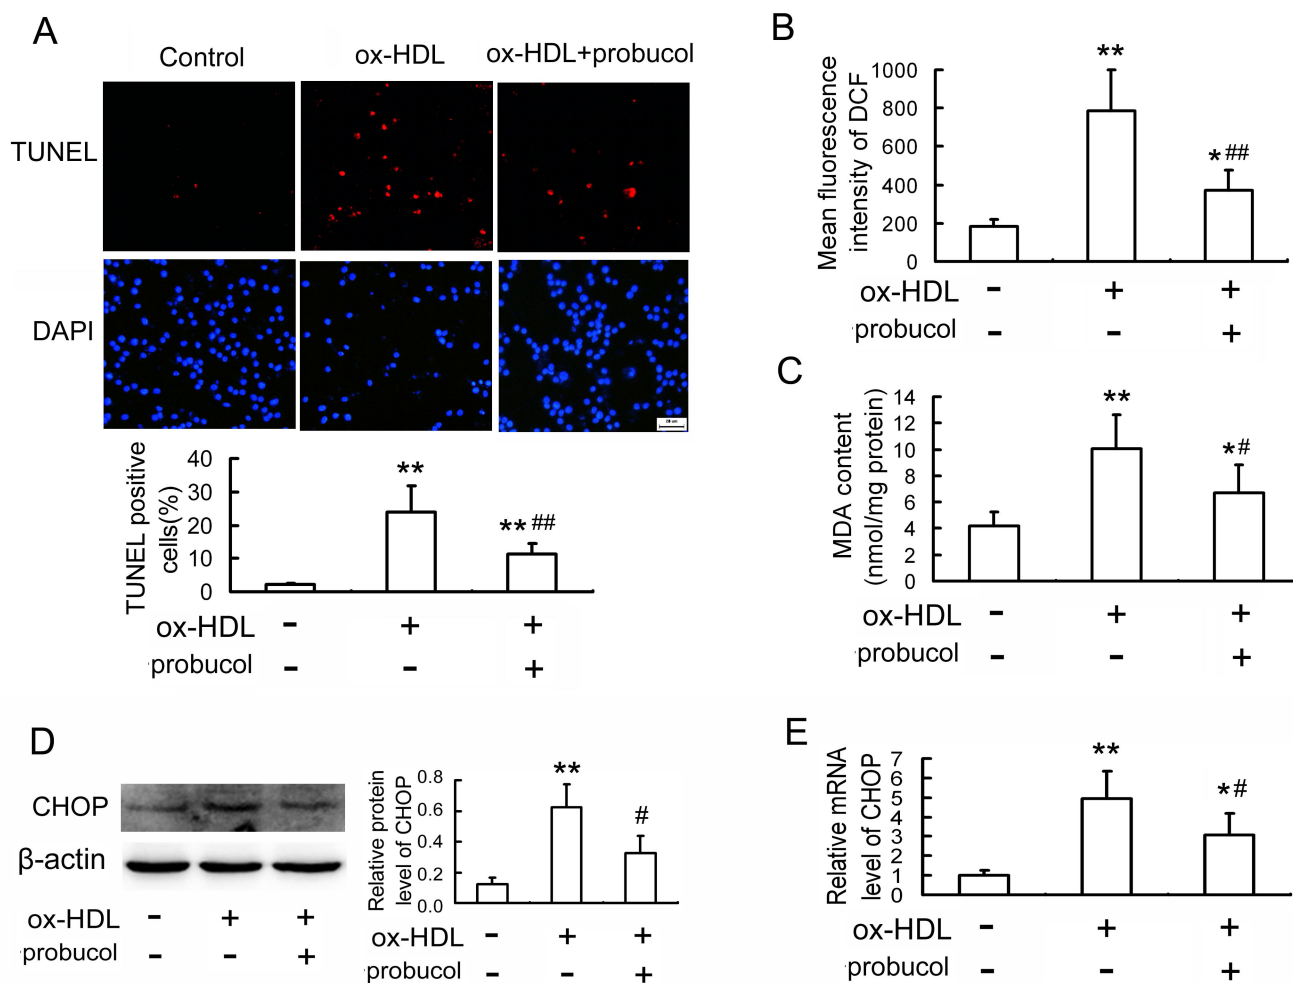

**Supplemental Figure S3: Probucol inhibits CHOP-mediated macrophage apoptosis induced by ox-HDL.** RAW264.7 cells were pretreated with or without 50  $\mu\text{mol/L}$  probucol (a ROS scavenger) for 1 h and then stimulated with ox-HDL (100 mg/L) for 24 h. (A) Cell apoptosis was measured by TUNEL assay. Scale bar =20  $\mu\text{m}$ . (B) Intracellular ROS levels were measured by DCF analysis using a flow cytometer. (C) MDA content was determined using commercial kits. (D and E) The protein and mRNA levels of CHOP were determined by Western blot and quantitative real-time PCR, respectively. Data are expressed as the mean  $\pm$  SD of at least three independent experiments. \* $P < 0.05$ , \*\* $P < 0.01$  versus control group; # $P < 0.05$ , ## $P < 0.01$  versus ox-HDL treatment.

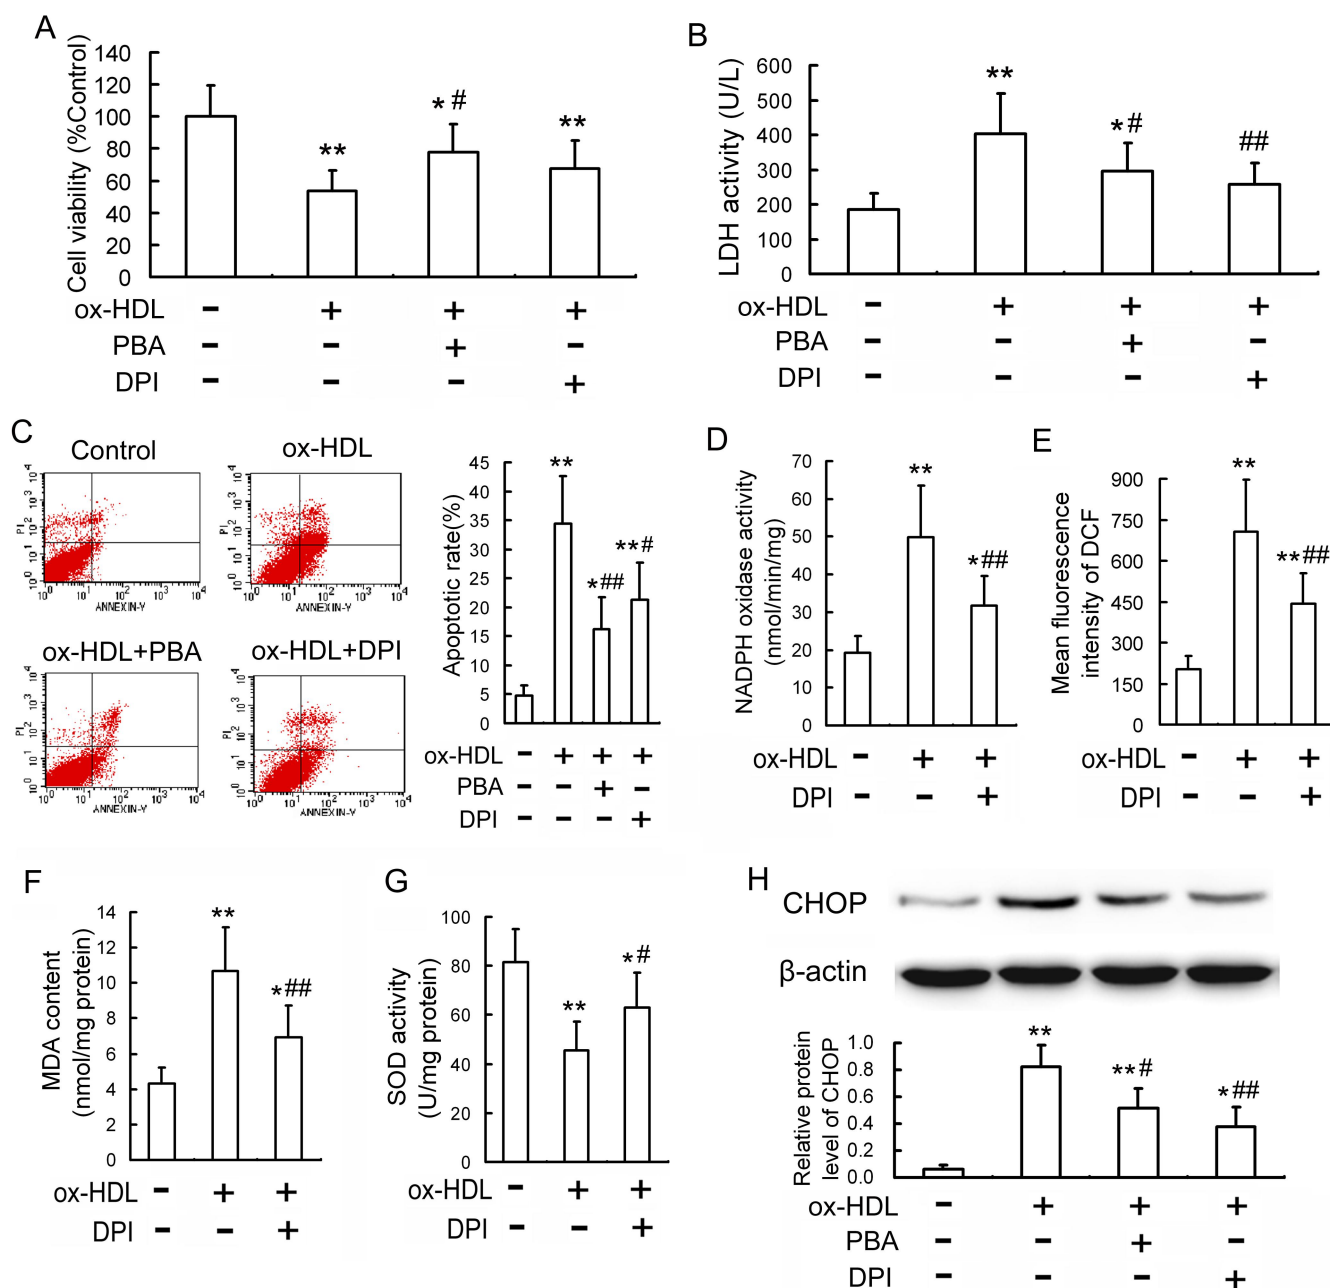

**Supplemental Figure S4: Ox-HDL induces oxidative stress and CHOP-mediated apoptosis in mouse peritoneal macrophages.** Peritoneal macrophages from C57BL/6J mice were harvested with PBS 3 days after intraperitoneal injection with 1 ml of 4% thioglycollate and maintained in DMEM with 10% FBS. Cells were pretreated with or without PBA (5 mmol/L) or DPI (5  $\mu$ mol/L) for 1 h, and then stimulated with ox-HDL (100 mg/L) for 24 h. Cell viability (A) and LDH activity in media (B) were determined by MTT assay and a kit, respectively. (C) Cell apoptosis was detected using flow cytometry and the total apoptotic cells were represented by the right side of the panel (Annexin V staining alone or together

with PI). (D) NADPH oxidase activity was determined by cytochrome C chromometry. (E) Intracellular ROS levels were measured by DCF analysis using a flow cytometer. (F and G) MDA content and SOD activity were determined using commercial kits. (H) Western blot analysis of CHOP. Data are expressed as the mean  $\pm$  SD of at least three independent experiments. \* $P$ <0.05, \*\* $P$ <0.01 versus control group; # $P$ <0.05, ## $P$ <0.01 versus ox-HDL treatment.

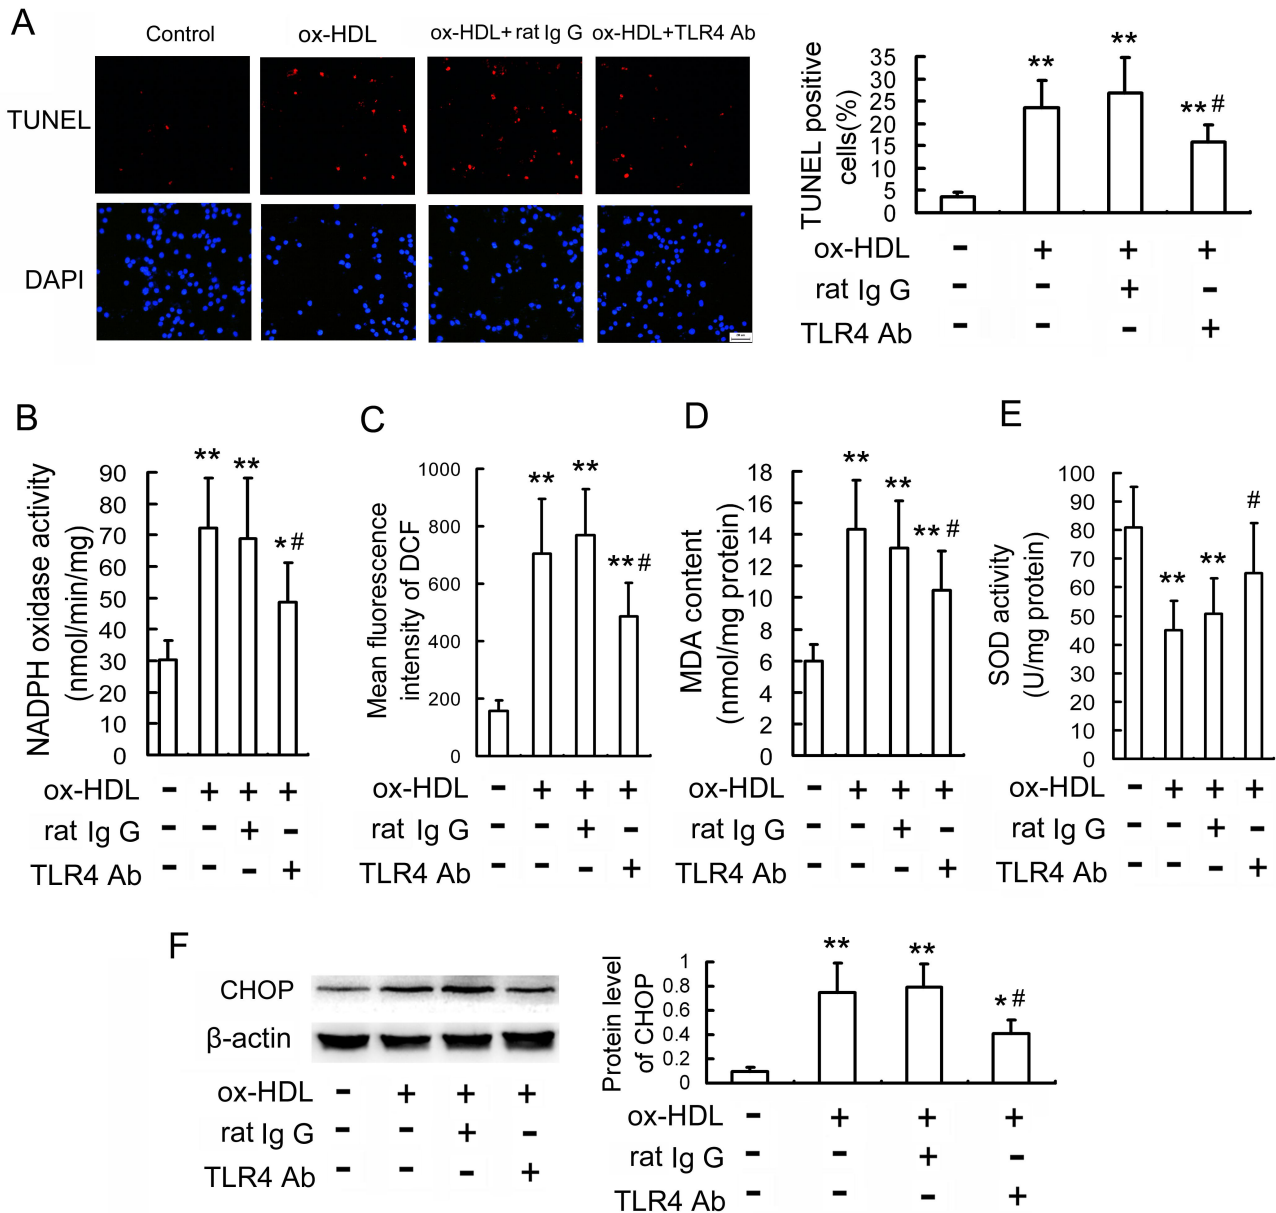

**Supplemental Figure S5: Anti-TLR4 antibody inhibits ox-HDL-induced oxidative stress and CHOP-mediated macrophage apoptosis.** RAW264.7 cells were preincubated with 2 mg/L of anti-TLR4 antibody (TLR4 Ab) or rat isotype IgG for 30 min and then treated with ox-HDL (100 mg/L) for 24 h. (A) Cell apoptosis was measured by TUNEL assay. Scale bar =20  $\mu$ m. (B) NADPH oxidase activity was determined by cytochrome C chromometry. (C) Intracellular ROS levels were measured by DCF analysis using a flow cytometer. (D and E) MDA content and SOD activity were determined using commercial kits. (F) CHOP protein level was determined by Western blot. Data are expressed as the mean  $\pm$  SD of at least three independent experiments. \* $P$ <0.05, \*\* $P$ <0.01 versus control group; # $P$ <0.05 versus ox-HDL treatment.

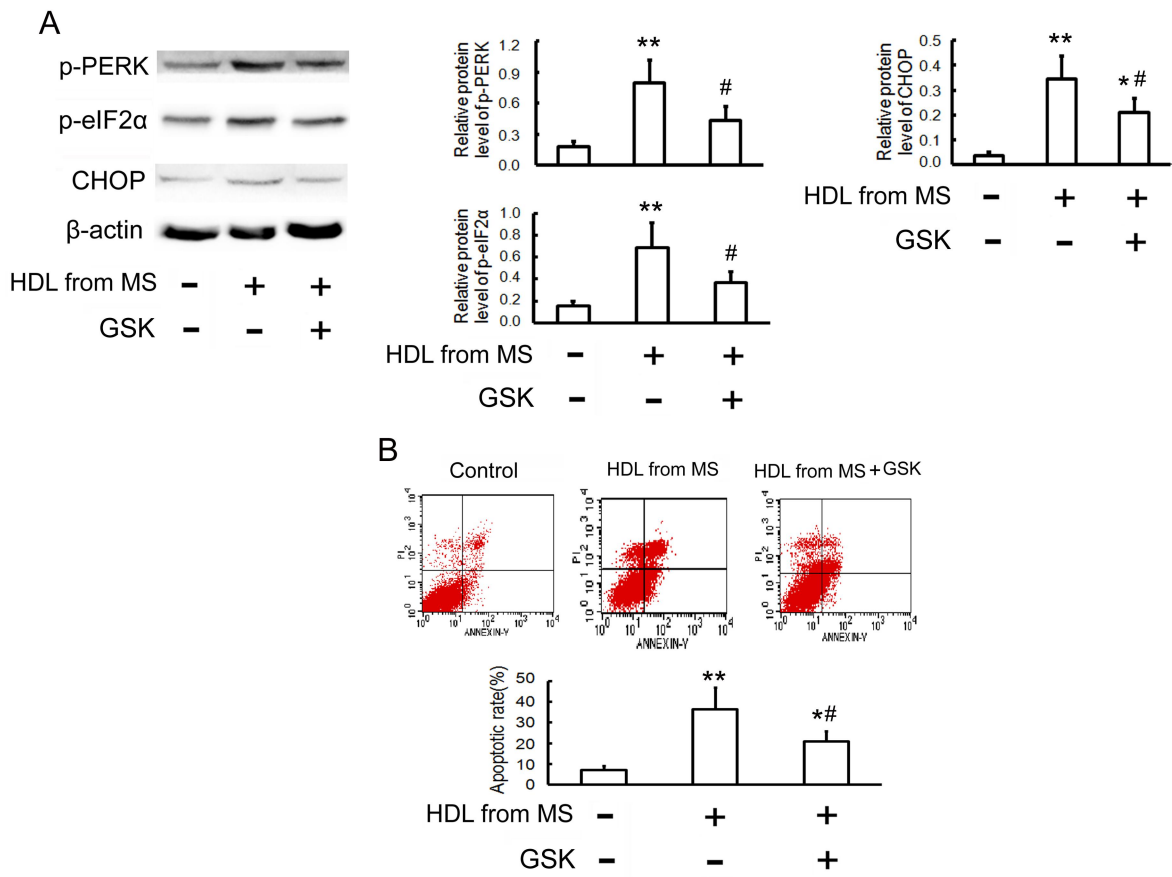

**Supplemental Figure S6: GSK2606414 inhibits CHOP-mediated macrophage apoptosis induced by HDL from MS patients.** RAW264.7 cells were pretreated with or without 40 nmol/L GSK2606414 (PERK inhibitor) for 1 h, and then stimulated with HDL from MS patients (100 mg/L) for 24 h. The protein levels of ER stress markers and apoptosis were determined by Western blot (A) and flow cytometry (B), respectively. Data are expressed as the mean  $\pm$  SD of at least three independent experiments. \* $P$ <0.05, \*\* $P$ <0.01 versus control group; # $P$ <0.05 versus HDL from MS patients treatment.



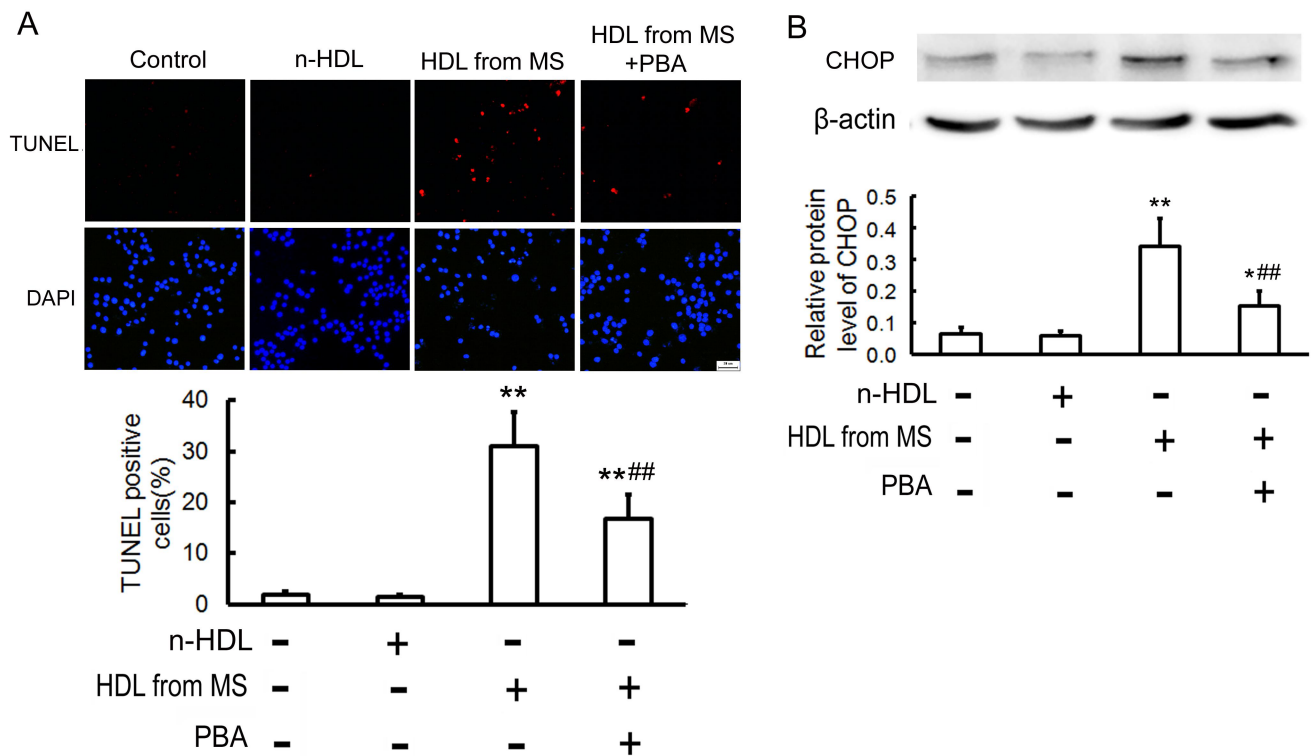

**Supplemental Figure S7: HDL from MS patients induces macrophage apoptosis and**

**CHOP upregulation.** HDL samples were isolated from individual fasting plasma of six MS

patients and six healthy subjects, respectively. RAW264.7 cells were pretreated with or

without PBA (5 mmol/L) for 1 h, followed by stimulation with HDL from MS patients (100

mg/L) or HDL from healthy subjects (n-HDL, 100 mg/L) for 24 h. (A) Cell apoptosis was

measured by TUNEL assay. Scale bar =20  $\mu$ m. (B) CHOP protein level was analyzed by

Western blot. Data are expressed as the mean  $\pm$  SD of six independent experiments. \* $P$ <0.05,

\*\* $P$ <0.01 versus control group; ## $P$ <0.01 versus treatment with HDL from MS patients.

**Supplemental Table S1: Clinical and biochemical characteristics of metabolic syndrome patients and healthy controls.**

|                                    | Metabolic syndrome | Healthy controls | p     |
|------------------------------------|--------------------|------------------|-------|
| Age, years                         | 49.5 ± 9.8         | 43.8 ± 8.6       | 0.02  |
| Waist circumference, cm            | 101.3 ± 13.6       | 76.6 ± 7.2       | <0.01 |
| Body mass index, kg/m <sup>2</sup> | 28.5 ± 4.0         | 21.6 ± 2.8       | <0.01 |
| Systolic blood pressure, mmHg      | 145.6 ± 21.7       | 128.5 ± 12.8     | <0.01 |
| Diastolic blood pressure, mmHg     | 86.2 ± 11.8        | 81.6 ± 9.1       | 0.096 |
| Glucose, mmol/L                    | 7.08 ± 2.06        | 5.12 ± 0.57      | <0.01 |
| Triglycerides, mmol/L              | 1.93 ± 0.65        | 0.96 ± 0.23      | <0.01 |
| HDL-cholesterol, mmol/L            | 1.24 ± 0.32        | 1.49 ± 0.35      | <0.01 |
| LDL-cholesterol, mmol/L            | 2.80 ± 0.82        | 2.48 ± 0.56      | 0.076 |

Data are expressed as the mean ± SD. Differences between metabolic syndrome group and control group were tested using the Student's t test.
